# Supplementary material for: Cardiorespiratory fitness as a predictor of intestinal microbial diversity and distinct metagenomic functions
Source: PubMed Central journal article supplement (PMC4976518; doi:10.1186/s40168-016-0189-7), 2016-08-08
Supplement: 40168_2016_189_MOESM1_ESM.pdf [file 40168_2016_189_MOESM1_ESM.pdf]

## 24 Hour Dietary Recall- Filled out Sample

| TIME    | FOODS<br>BEVERAGES               | METHOD OF PREPARATION<br>BRAND NAME | AMOUNT     |
|---------|----------------------------------|-------------------------------------|------------|
|         | <b>EXAMPLE</b>                   | <u>WRONG WAY</u>                    |            |
| 8 AM    | Cereal                           |                                     | 1 bowl     |
| 8 AM    | Milk                             | On cereal                           | ½ glass    |
| 8 AM    | Juice                            |                                     | 1 glass    |
|         | Peanut butter and jelly sandwich |                                     | 1 sandwich |
|         | Apple Juice                      |                                     | 1 box      |
|         | Candy bar                        |                                     | 1          |
|         | Hamburger                        |                                     | 1          |
|         | Soda                             |                                     | 1 bottle   |
|         |                                  |                                     |            |
|         | <b>EXAMPLE</b>                   | <u>RIGHT WAY</u>                    |            |
| 8 AM    | Cereal                           | Cheerios                            | 1 cup      |
| 8 AM    | Milk, Whole                      | On cereal                           | ½ cup      |
| 8 AM    | Orange Juice                     | From concentrate                    | 4 oz       |
| 12 PM   | White Bread                      | Wonder                              | 2 slices   |
| 12 PM   | Peanut Butter                    | Jiff                                | 2 Tbls     |
| 12 PM   | Grape Jelly                      | Welch's                             | 1 Tbls     |
| 12 PM   | Apple Juice                      | Juice box                           | 8.25 oz    |
| 3:30 PM | Candy Bar                        | Hersheys                            | 1.45 oz    |
| 6 PM    | Hamburger                        | McDonald's                          | 1 regular  |
| 6 PM    | Coke                             | McDonald's                          | 12 oz      |
